# Supplementary material for: Elevated VMP1 expression in acute myeloid leukemia amplifies autophagy and is protective against venetoclax-induced apoptosis
Source: PubMed Central journal article supplement (PMC6541608; doi:10.1038/s41419-019-1648-4), 2019-05-29

**Supplemental Figure S5.**

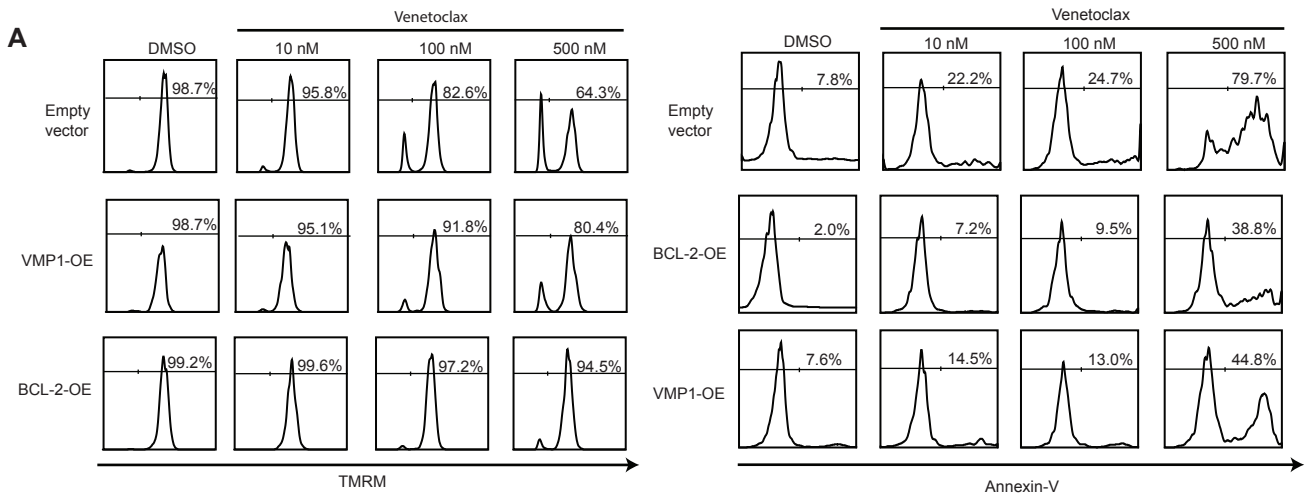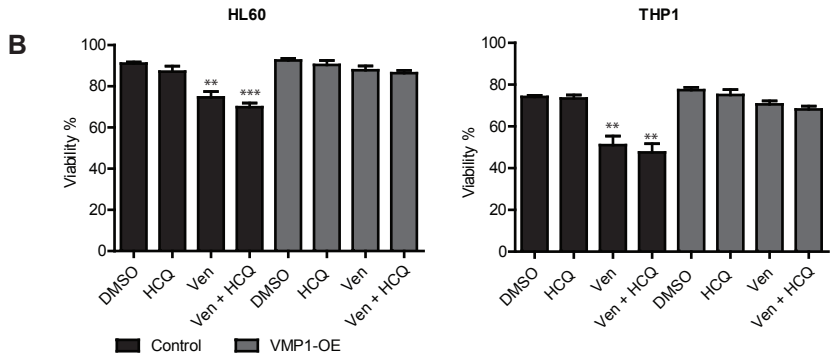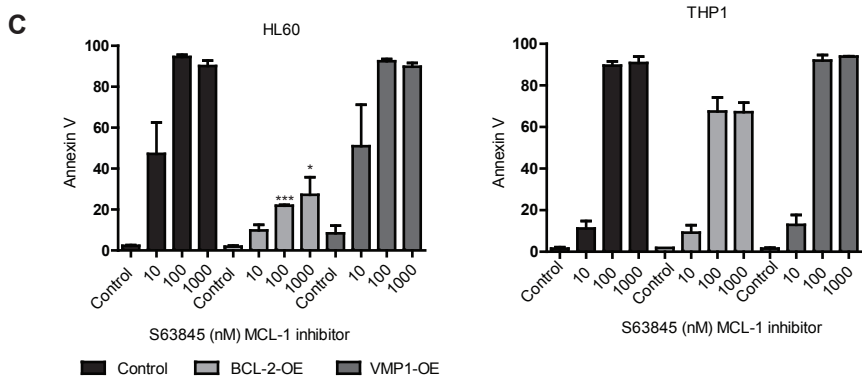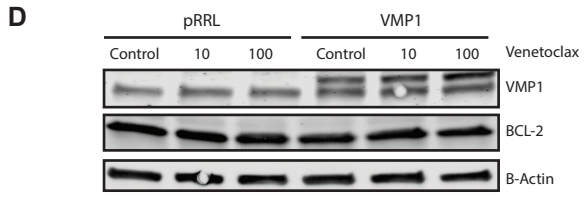

Supplement: 41419_2019_1648_MOESM6_ESM.pdf [file 41419_2019_1648_MOESM6_ESM.pdf]
